# Supplementary material
Source: PubMed Central journal article supplement (PMC8454718)
Supplement: mmc1.pdf [file mmc1.pdf]

**The Innovation, Volume 2**

**Supplemental Information**

**Ambient air pollution and low temperature**

**associated with case fatality of COVID-19:**

**A nationwide retrospective cohort study in China**

**Fei Tian, Xiaobo Liu, Qingchen Chao, Zhengmin (Min) Qian, Siqi Zhang, Li Qi, Yanlin Niu, Lauren D. Arnold, Shiyu Zhang, Huan Li, Hualiang Lin, and Qiyong Liu**

## Supplementary Materials

### Contents

Table S1. The univariate analysis of risk factors for COVID-19 fatality in China.

Table S2. Characteristics of study participants by survival status in China using resampling approach.

Table S3. Spearman's correlation coefficients among meteorological variables and air pollutants during the different exposure windows.

Table S4. Sensitivity analyses for the hazard ratios of COVID-19 fatality associated with each 10  $\mu\text{g}/\text{m}^3$  increase in  $\text{PM}_{2.5}$ ,  $\text{PM}_{10}$ ,  $\text{SO}_2$ ,  $\text{NO}_2$ , and  $\text{O}_3$  in different model parameters.

Table S5. Hazard ratios of COVID-19 fatality mortality associated with 10  $\mu\text{g}/\text{m}^3$  increase in  $\text{PM}_{2.5}$ ,  $\text{PM}_{10}$ ,  $\text{NO}_2$ , and  $\text{O}_3$  in the two-pollutant models.

Table S6. Hazard ratios and 95% CI of case fatality of COVID-19 associated with environmental factors of overall exposure windows in China.

Figure S1. The distribution of the COVID-19 case fatality rate in China.

Figure S2. The distribution of the average temperature during the COVID-19 epidemic in China.

Figure S3. The distribution of the average concentration of  $\text{PM}_{2.5}$  during the COVID-19 epidemic in China.

Figure S4. The distribution of the average concentration of  $\text{PM}_{10}$  during the COVID-19 epidemic in China.

Figure S5. The distribution of the average concentration of  $\text{NO}_2$  during the COVID-19 epidemic in China.

Figure S6. The distribution of the average concentration of  $\text{SO}_2$  during the COVID-19 epidemic in

China.

Figure S7. The distribution of the average concentration of O<sup>3</sup> during the COVID-19 epidemic in

China.

Figure S8. Hazard ratios (HRs) and 95% CIs of COVID-19 case-fatality associated with each 10 µg/m<sup>3</sup> increase in air pollutant concentrations at different lags in China.

Effect estimation using the date of symptom onset (A) and the date of diagnosis (B) are shown.

Figure S9. Hazard ratios (HRs) and 95% CIs of case-fatality of COVID-19 associated with each 1 °C decrease in temperature at different lag days in China. Effect estimations using the date of onset and diagnosis are shown.

Text S1. Regression equations for Cox regression models for ambient air pollution.

Text S2. Regression equations for Cox regression models for ambient temperature.

Table S1. The univariate analysis of risk factors for COVID-19 fatality in China.

| Variables         | Univariate Analysis |      |                     |                  |       |                  |           |
|-------------------|---------------------|------|---------------------|------------------|-------|------------------|-----------|
|                   | Coefficient         | SE   | HR (95% CI)         | Likelihood-ratio | Wald  | Score (log rank) | P Value * |
| <b>Age group</b>  |                     |      |                     | 25624            | 21357 | 31939            |           |
| < 25 years        |                     |      | 1.00 (Ref)          |                  |       |                  |           |
| 25-65 years       | 2.57                | 0.17 | 1.87 (1.26, 2.76)   |                  |       |                  | <0.01     |
| ≥ 65 years        | 4.64                | 0.17 | 5.64 (3.88, 8.23)   |                  |       |                  | <0.01     |
| <b>Sex</b>        |                     |      |                     | 1853             | 1780  | 1829             |           |
| Male              |                     |      | 1.00 (Ref)          |                  |       |                  |           |
| Female            | -0.57               | 0.01 | 0.56 (0.54, 0.58)   |                  |       |                  | <0.01     |
| <b>Occupation</b> |                     |      |                     | 8072             | 5111  | 6507             |           |
| Medical-related   |                     |      | 1.00 (Ref)          |                  |       |                  |           |
| Service-related   | 0.09                | 0.14 | 1.10 (0.83, 1.44)   |                  |       |                  | 0.51      |
| Office worker     | 0.59                | 0.09 | 1.82 (1.52, 2.18)   |                  |       |                  | <0.01     |
| Home worker       | 2.30                | 0.09 | 10.04 (8.42, 11.96) |                  |       |                  | <0.01     |
| Others            | 1.75                | 0.09 | 2.91 (1.59, 5.35)   |                  |       |                  | <0.01     |
| <b>Residence</b>  |                     |      |                     | 627.9            | 649.5 | 655.9            |           |
| Local             |                     |      | 1.00 (Ref)          |                  |       |                  |           |
| Migrant           | 0.34                | 0.01 | 1.41 (1.37, 1.45)   |                  |       |                  | <0.01     |
| <b>Severity</b>   |                     |      |                     | 32715            | 39291 | 72970            |           |
| Mild/asymptomatic |                     |      | 1.00 (Ref)          |                  |       |                  |           |
| Moderate          | -0.30               | 0.02 | 0.73 (0.71, 0.77)   |                  |       |                  | 0.89      |
| Severe            | 1.44                | 0.01 | 4.24 (4.09, 4.39)   |                  |       |                  | < 0.01    |

|                                       |       |       |                      |       |       |       |        |
|---------------------------------------|-------|-------|----------------------|-------|-------|-------|--------|
| Critical                              | 3.02  | 0.02  | 20.47 (19.74, 21.23) |       |       |       | < 0.01 |
| <b>Hospital transfer</b>              |       |       |                      | 15.62 | 15.48 | 15.48 |        |
| No                                    |       |       | 1.00 (Ref)           |       |       |       |        |
| Yes                                   | -0.06 | 0.01  | 0.94 (0.91, 0.97)    |       |       |       | < 0.01 |
| <b>Location</b>                       |       |       |                      | 6333  | 5126  | 5756  |        |
| Non-Wuhan                             |       |       | 1.00 (Ref)           |       |       |       |        |
| Wuhan                                 | 1.19  | 0.02  | 3.27 (3.17, 3.38)    |       |       |       | < 0.01 |
| <b>Province</b>                       |       |       |                      | 6119  | 2941  | 4225  |        |
| Inside Hubei                          |       |       | 1.00 (Ref)           |       |       |       |        |
| Outside Hubei                         | -2.12 | 0.04  | 0.12 (0.11, 0.13)    |       |       |       | < 0.01 |
| <b>Lockdown</b> †                     |       |       |                      | 1270  | 1396  | 1432  |        |
| Before                                |       |       | 1.00 (Ref)           |       |       |       |        |
| After                                 | -0.55 | 0.01  | 0.57 (0.56, 0.59)    |       |       |       | < 0.01 |
| <b>GDP Per Capita</b>                 | -0.06 | 0.005 | 0.94 (0.93, 0.95)    | 115   | 109.5 | 109   | < 0.01 |
| <b>Hospital Beds per 1000 Persons</b> | 1.13  | 0.03  | 3.11 (2.95, 3.28)    | 2691  | 1729  | 1852  | < 0.01 |

Note: HR, hazard ratio; GDP, gross domestic product.

\* *P* values were calculated by  $\chi^2$  test or Fisher's exact test, as appropriate.

† Lockdown: On 23 January 2020, the central government of China imposed a lockdown in Wuhan and other cities in Hubei.

Table S2. Characteristics of study participants by survival status in China using resampling approach.

| Variable                               | Deceased<br>(n=3,934) | Alive (n=3,934) § |              | P-value † |
|----------------------------------------|-----------------------|-------------------|--------------|-----------|
|                                        |                       | Resampling value  | 95% CI       |           |
| <b>Environmental factors</b>           |                       |                   |              |           |
| <b>Exposure window I *</b>             |                       |                   |              |           |
| Temperature (°C)                       | 5.90 ± 2.24           | 6.27 ± 0.06       | 6.17, 6.37   | <0.001    |
| Relative humidity (%)                  | 80.13 ± 5.75          | 78.09 ± 0.13      | 77.87, 78.31 | <0.001    |
| PM <sub>2.5</sub> (µg/m <sup>3</sup> ) | 53.71 ± 15.52         | 51.03 ± 0.03      | 50.50, 51.57 | <0.001    |
| PM <sub>10</sub> (µg/m <sup>3</sup> )  | 62.02 ± 16.93         | 59.76 ± 0.04      | 59.18, 60.42 | <0.001    |
| O <sub>3</sub> (µg/m <sup>3</sup> )    | 54.31 ± 9.03          | 56.02 ± 0.01      | 55.77, 56.27 | <0.001    |
| SO <sub>2</sub> (µg/m <sup>3</sup> )   | 7.33 ± 2.11           | 7.68 ± 0.01       | 7.58, 7.77   | <0.001    |
| NO <sub>2</sub> (µg/m <sup>3</sup> )   | 22.88 ± 6.61          | 19.81 ± 0.01      | 19.63, 19.99 | <0.001    |
| <b>Exposure window II *</b>            |                       |                   |              |           |
| Temperature (°C)                       | 7.41 ± 2.76           | 6.27 ± 0.06       | 6.18, 6.36   | <0.001    |
| Relative humidity (%)                  | 79.66 ± 6.53          | 78.20 ± 0.13      | 78.00, 78.41 | <0.001    |
| PM <sub>2.5</sub> (µg/m <sup>3</sup> ) | 45.11 ± 17.32         | 51.11 ± 0.03      | 50.58, 51.69 | <0.001    |
| PM <sub>10</sub> (µg/m <sup>3</sup> )  | 49.85 ± 18.66         | 59.93 ± 0.04      | 59.21, 60.46 | <0.001    |
| O <sub>3</sub> (µg/m <sup>3</sup> )    | 54.73 ± 9.01          | 55.97 ± 0.02      | 55.70, 56.22 | <0.001    |
| SO <sub>2</sub> (µg/m <sup>3</sup> )   | 7.41 ± 2.10           | 7.65 ± 0.01       | 7.57, 7.74   | <0.001    |
| NO <sub>2</sub> (µg/m <sup>3</sup> )   | 19.54 ± 6.17          | 19.91 ± 0.01      | 19.74, 20.08 | <0.001    |
| <b>Age group (n, %)</b>                |                       |                   |              | <0.001    |
| < 25 years                             | 6 (0.15)              | 203 (5.16)        | 179, 226     |           |
| 25-64 years                            | 1146 (29.13)          | 2905 (73.84)      | 2860, 2949   |           |
| ≥ 65 years                             | 2782 (70.72)          | 826 (21.00)       | 785, 867     |           |
| <b>Sex (n, %)</b>                      |                       |                   |              | <0.001    |
| Male                                   | 2515 (63.93)          | 1983 (50.41)      | 1932, 2033   |           |
| Female                                 | 1419 (36.07)          | 1951 (49.59)      | 1899, 2000   |           |
| <b>Occupation (n, %)</b>               |                       |                   |              | <0.001    |
| Medical-related                        | 21 (0.53)             | 152 (3.86)        | 132, 171     |           |
| Service-related                        | 15 (0.38)             | 99 (2.52)         | 83, 115      |           |
| Office worker                          | 226 (5.74)            | 895 (22.75)       | 849, 937     |           |
| Homemaker                              | 3226 (82.00)          | 2238 (56.89)      | 2189, 2290   |           |
| Others                                 | 446 (11.34)           | 550 (13.98)       | 515, 588     |           |

|                          |              |              |                  |
|--------------------------|--------------|--------------|------------------|
| <b>Residence (n, %)</b>  |              |              | <b>&lt;0.001</b> |
| Permanent                | 2476 (62.94) | 2785 (70.79) | 2738, 2833       |
| Temporarily              | 1458 (37.06) | 1149 (29.21) | 1101, 1196       |
| <b>Severity (n, %)</b>   |              |              | <b>&lt;0.001</b> |
| Mild                     | 806 (20.49)  | 1627 (41.36) | 1576, 1678       |
| Moderate                 | 597 (15.18)  | 1635 (41.56) | 1585, 1683       |
| Severe                   | 1285 (32.66) | 585 (14.87)  | 548, 619         |
| Critical                 | 1246 (31.67) | 87 (2.21)    | 72, 103          |
| <b>Hospital transfer</b> |              |              | <b>0.092</b>     |
| No                       | 2927 (74.40) | 2886 (73.36) | 2839, 2928       |
| Yes                      | 1007 (25.60) | 1048 (26.64) | 1006, 1095       |

Note: PM<sub>2.5</sub>, particulate matter with an aerodynamic diameter  $\leq 2.5$   $\mu\text{m}$ ; PM<sub>10</sub>, particulate matter with an aerodynamic diameter  $\leq 10$   $\mu\text{m}$ ; SO<sub>2</sub>, sulfur dioxide; NO<sub>2</sub>, nitrogen dioxide; O<sub>3</sub>, ozone.

\* Exposure window I represents the mean exposure value from the date of symptom onset to the date of diagnosis; Exposure window II represents the mean exposure value from the date of diagnosis to the date of death or the end of the study.

† *P*-value were calculated by  $\chi^2$  test or Fisher's exact test, as appropriate.

§ The results of the alive were based on the 1000 times random resampling.

Table S3. Spearman's correlation coefficients among meteorological variables and air pollutants during the different exposure windows. \*

| Variables            | Temperature | Relative humidity | PM <sub>2.5</sub> | PM <sub>10</sub> | O <sub>3</sub> | NO <sub>2</sub> | SO <sub>2</sub> |
|----------------------|-------------|-------------------|-------------------|------------------|----------------|-----------------|-----------------|
| <b>Exposure I †</b>  |             |                   |                   |                  |                |                 |                 |
| Temperature          | 1.00        |                   |                   |                  |                |                 |                 |
| Relative humidity    | -0.14       | 1.00              |                   |                  |                |                 |                 |
| PM <sub>2.5</sub>    | 0.36        | -0.16             | 1.00              |                  |                |                 |                 |
| PM <sub>10</sub>     | 0.35        | -0.17             | 0.96              | 1.00             |                |                 |                 |
| NO <sub>2</sub>      | 0.19        | 0.02              | 0.45              | 0.43             | 1.00           |                 |                 |
| SO <sub>2</sub>      | 0.43        | -0.39             | 0.34              | 0.38             | 0.31           | 1.00            |                 |
| O <sub>3</sub>       | 0.01        | -0.59             | 0.23              | 0.22             | -0.21          | 0.18            | 1.00            |
| <b>Exposure II †</b> |             |                   |                   |                  |                |                 |                 |
| Temperature          | 1.00        |                   |                   |                  |                |                 |                 |
| Relative humidity    | -0.34       | 1.00              |                   |                  |                |                 |                 |
| PM <sub>2.5</sub>    | 0.45        | -0.30             | 1.00              |                  |                |                 |                 |
| PM <sub>10</sub>     | 0.29        | -0.58             | 0.76              | 1.00             |                |                 |                 |
| NO <sub>2</sub>      | -0.12       | -0.13             | 0.15              | 0.23             | 1.00           |                 |                 |
| SO <sub>2</sub>      | 0.16        | -0.25             | 0.28              | 0.37             | 0.31           | 1.00            |                 |
| O <sub>3</sub>       | -0.06       | -0.28             | 0.01              | 0.14             | -0.16          | 0.08            | 1.00            |

Note: PM<sub>2.5</sub>, particulate matter with an aerodynamic diameter  $\leq 2.5$   $\mu\text{m}$ ; PM<sub>10</sub>, particulate matter with an aerodynamic diameter  $\leq 10$   $\mu\text{m}$ ; SO<sub>2</sub>, sulfur dioxide; NO<sub>2</sub>, nitrogen dioxide; O<sub>3</sub>, ozone.

\* All pairwise correlation coefficients were statistically significant ( $P < 0.05$ ).

† Exposure window I represents the mean exposure value from the date of symptom onset to the date of diagnosis; Exposure window II represents the mean exposure value from the date of diagnosis to the date of death or the end of the study.



Table S4. Sensitivity analyses for the hazard ratios of COVID-19 fatality associated with each 10 µg/m<sup>3</sup> increase in PM<sub>2.5</sub>, PM<sub>10</sub>, SO<sub>2</sub>, NO<sub>2</sub>, and O<sub>3</sub> in different model parameters.

| <b>Models</b> †            | <b>PM<sub>2.5</sub></b> * | <b>PM<sub>10</sub></b> * | <b>NO<sub>2</sub></b> * | <b>SO<sub>2</sub></b> * | <b>O<sub>3</sub></b> * |
|----------------------------|---------------------------|--------------------------|-------------------------|-------------------------|------------------------|
| df=2 for temperature       | 1.11 (1.09, 1.13)         | 1.10 (1.08, 1.12)        | 1.25 (1.16, 1.34)       | 1.10 (0.95, 1.27)       | 1.08 (1.02, 1.14)      |
| df=4 for temperature       | 1.10 (1.07, 1.13)         | 1.10 (1.07, 1.12)        | 1.27 (1.19, 1.35)       | 1.10 (0.95, 1.26)       | 1.09 (1.03, 1.15)      |
| df=5 for relative humidity | 1.11 (1.08, 1.13)         | 1.10 (1.08, 1.12)        | 1.27 (1.18, 1.35)       | 1.11 (0.95, 1.27)       | 1.09 (1.03, 1.14)      |
| df=2 for relative humidity | 1.10 (1.08, 1.13)         | 1.10 (1.08, 1.13)        | 1.26 (1.19, 1.36)       | 1.10 (0.95, 1.27)       | 1.12 (1.03, 1.20)      |
| df=4 for relative humidity | 1.11 (1.08, 1.14)         | 1.10 (1.08, 1.12)        | 1.27 (1.19, 1.35)       | 1.09 (0.95, 1.25)       | 1.09 (1.03, 1.14)      |
| df=5 for relative humidity | 1.09 (1.07, 1.12)         | 1.10 (1.08, 1.13)        | 1.26 (1.18, 1.36)       | 1.10 (0.95, 1.27)       | 1.09 (1.03, 1.14)      |
| df=6 for relative humidity | 1.11 (1.08, 1.14)         | 1.10 (1.08, 1.12)        | 1.27 (1.19, 1.35)       | 1.10 (0.96, 1.27)       | 1.10 (1.05, 1.15)      |

\*Effect estimated using Window I, and exposure window I represents the mean exposure value from the date of symptom onset to the date of diagnosis.

† Multivariate model, adjusted for age, sex, occupation, residence, severity of the illness, location, and transfer history, temporal trend, lockdown, city-level GDP, hospital beds per 1000 persons, temperature (only for the pollutants) and relative humidity.

Table S5. Hazard ratios of COVID-19 fatality mortality associated with 10  $\mu\text{g}/\text{m}^3$  increase in  $\text{PM}_{2.5}$ ,

$\text{PM}_{10}$ ,  $\text{NO}_2$ , and  $\text{O}_3$  in the two-pollutant models.

| <b>Pollutants</b>                   | <b>Models</b>                | <b>Hazard Ratios</b> | <b><i>P</i>-value<sup>†</sup></b> |
|-------------------------------------|------------------------------|----------------------|-----------------------------------|
| <b><math>\text{PM}_{2.5}</math></b> | Single pollutant model       | 1.11 (1.09, 1.13)    |                                   |
|                                     | <b>Two- pollutant model</b>  |                      |                                   |
|                                     | Adjust for $\text{O}_3$      | 1.11 (1.09, 1.14)    | 0.99                              |
|                                     | Adjust for $\text{NO}_2$     | 1.10 (1.07, 1.13)    | 0.58                              |
|                                     | Adjust for $\text{SO}_2$     | 1.13 (1.11, 1.16)    | 0.22                              |
| <b><math>\text{PM}_{10}</math></b>  | Single pollutant model       | 1.10 (1.08, 1.13)    |                                   |
|                                     | <b>Two- pollutant model</b>  |                      |                                   |
|                                     | Adjust for $\text{O}_3$      | 1.10 (1.08, 1.13)    | 0.99                              |
|                                     | Adjust for $\text{NO}_2$     | 1.09 (1.07, 1.12)    | 0.58                              |
|                                     | Adjust for $\text{SO}_2$     | 1.13 (1.10, 1.15)    | 0.09                              |
| <b><math>\text{NO}_2</math></b>     | Single pollutant model       | 1.27 (1.19, 1.35)    |                                   |
|                                     | <b>Two- pollutant model</b>  |                      |                                   |
|                                     | Adjust for $\text{PM}_{2.5}$ | 1.08 (0.99, 1.17)    | <0.01                             |
|                                     | Adjust for $\text{PM}_{10}$  | 1.06 (0.98, 1.16)    | <0.01                             |
|                                     | Adjust for $\text{O}_3$      | 1.28 (1.19, 1.36)    | 0.86                              |
| <b><math>\text{O}_3</math></b>      | Single pollutant model       | 1.09 (1.03, 1.14)    |                                   |
|                                     | <b>Two- pollutant model</b>  |                      |                                   |
|                                     | Adjust for $\text{PM}_{2.5}$ | 1.01 (0.95, 1.06)    | 0.04                              |
|                                     | Adjust for $\text{PM}_{10}$  | 1.01 (0.96, 1.06)    | 0.04                              |
|                                     | Adjust for $\text{NO}_2$     | 1.09 (1.04, 1.15)    | 0.99                              |
|                                     | Adjust for $\text{SO}_2$     | 1.09 (1.04, 1.14)    | 0.99                              |

\*Effect estimated using Window I.

<sup>†</sup> Estimated using likelihood ratio test by comparing the single-pollutant model and each nested two-pollutant model.

Table S6. Hazard ratios and 95% CI of case fatality of COVID-19 associated with environmental factors of overall exposure windows in China \*.

| Variables         | Hazard Ratios (95% CI) |                   |
|-------------------|------------------------|-------------------|
|                   | Crude §                | Adjusted ‡        |
| Temperature       | 1.30 (1.28, 1.32)      | 2.34 (2.30, 2.39) |
| PM <sub>2.5</sub> | 1.22 (1.14, 1.30)      | 1.31 (1.26, 1.37) |
| PM <sub>10</sub>  | 1.20 (1.18, 1.22)      | 1.29 (1.15, 1.44) |
| NO <sub>2</sub>   | 1.32 (1.13, 1.51)      | 1.52 (1.23, 1.80) |
| SO <sub>2</sub>   | 0.75 (0.52, 0.99)      | 1.06 (0.83, 1.29) |
| O <sub>3</sub>    | 0.93 (0.73, 1.11)      | 1.32 (1.14, 1.51) |

Note: PM<sub>2.5</sub>, particulate matter with an aerodynamic diameter  $\leq 2.5 \mu\text{m}$ ; PM<sub>10</sub>, particulate matter with an aerodynamic diameter  $\leq 10 \mu\text{m}$ ; SO<sub>2</sub>, sulfur dioxide; NO<sub>2</sub>, nitrogen dioxide; O<sub>3</sub>, ozone.

\* Exposure window represents the exposure window of whole infection course (from the symptom onset to death/recovery or end of the study)

§ Crude model, with no adjustment.

‡ Multivariate model, adjusted for age, sex, occupation, residence, severity of the illness, location, and transfer history, temporal trend, lockdown, city-level GDP, hospital beds per 1000 persons, temperature (only for the pollutants) and relative humidity.

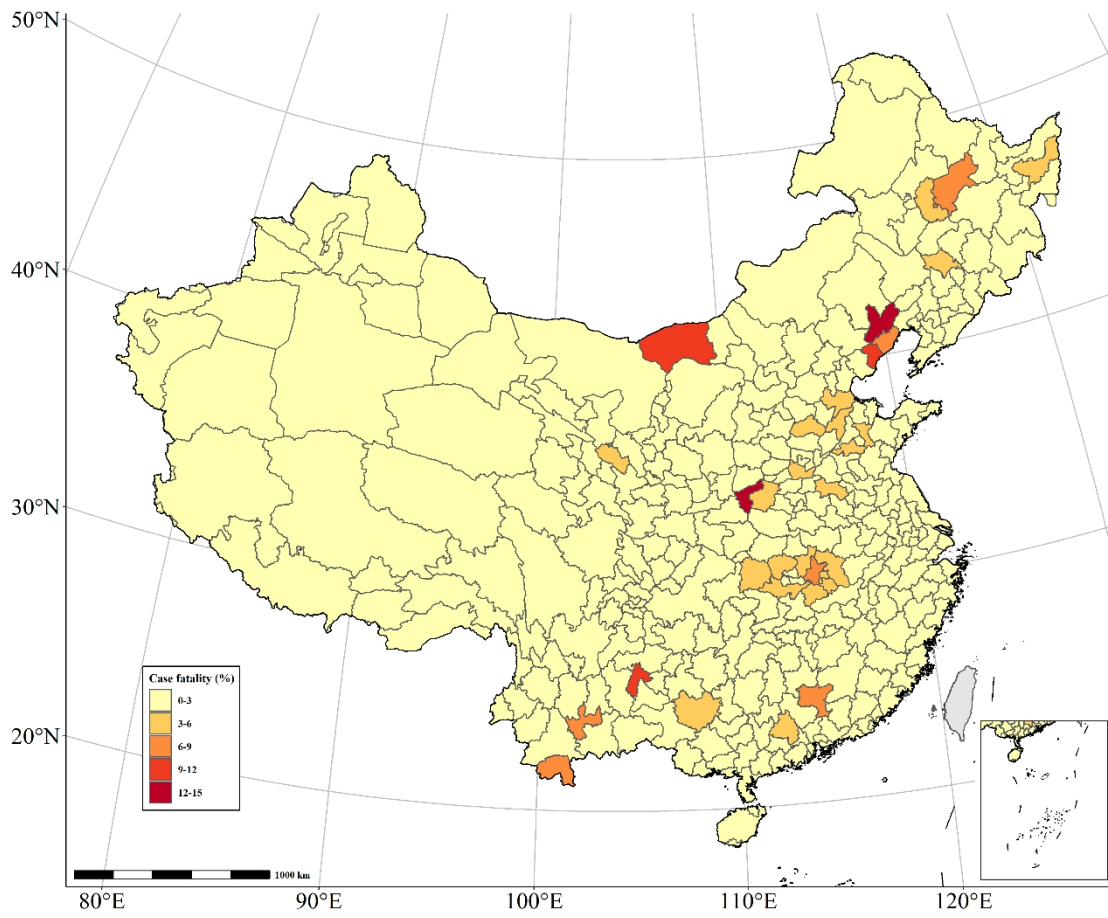

Figure S1. The distribution of fatality rates across the 321 cities in China.

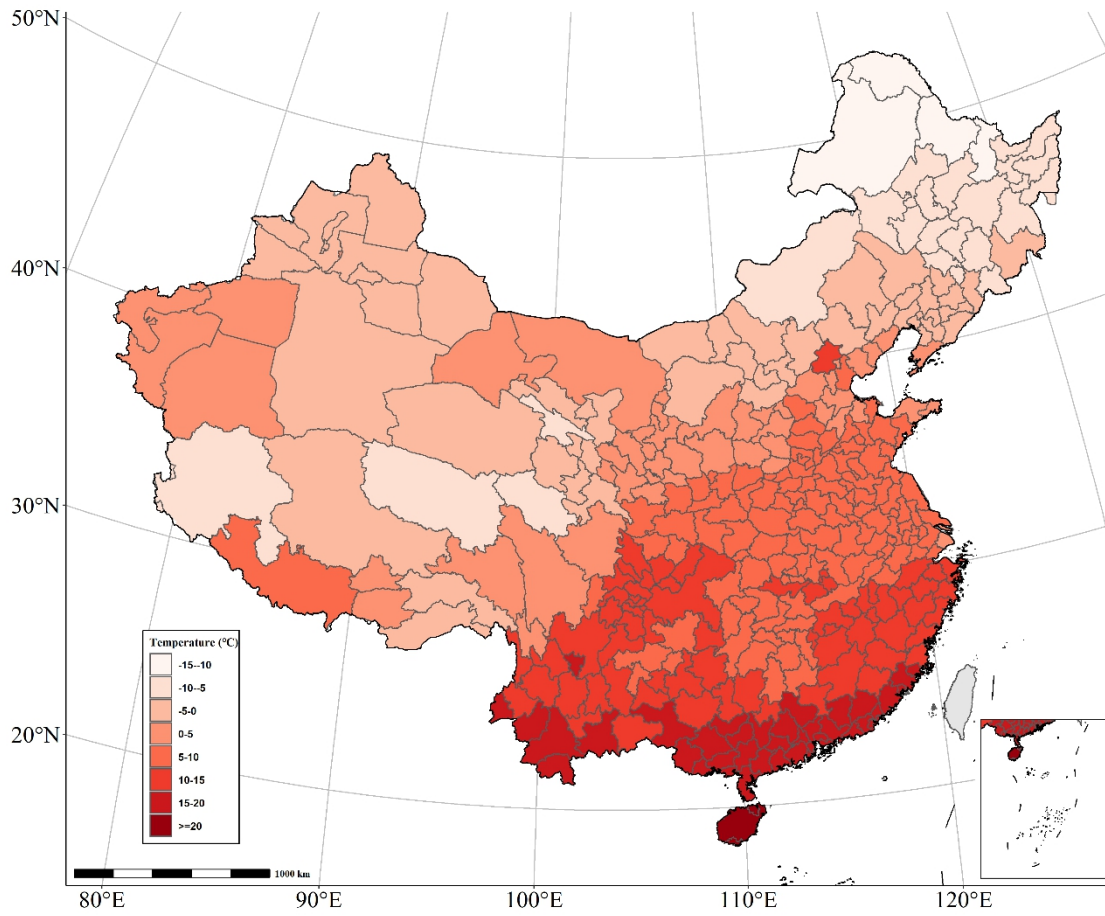

Figure S2. The distribution of the average temperature during the COVID-19 epidemic in China.

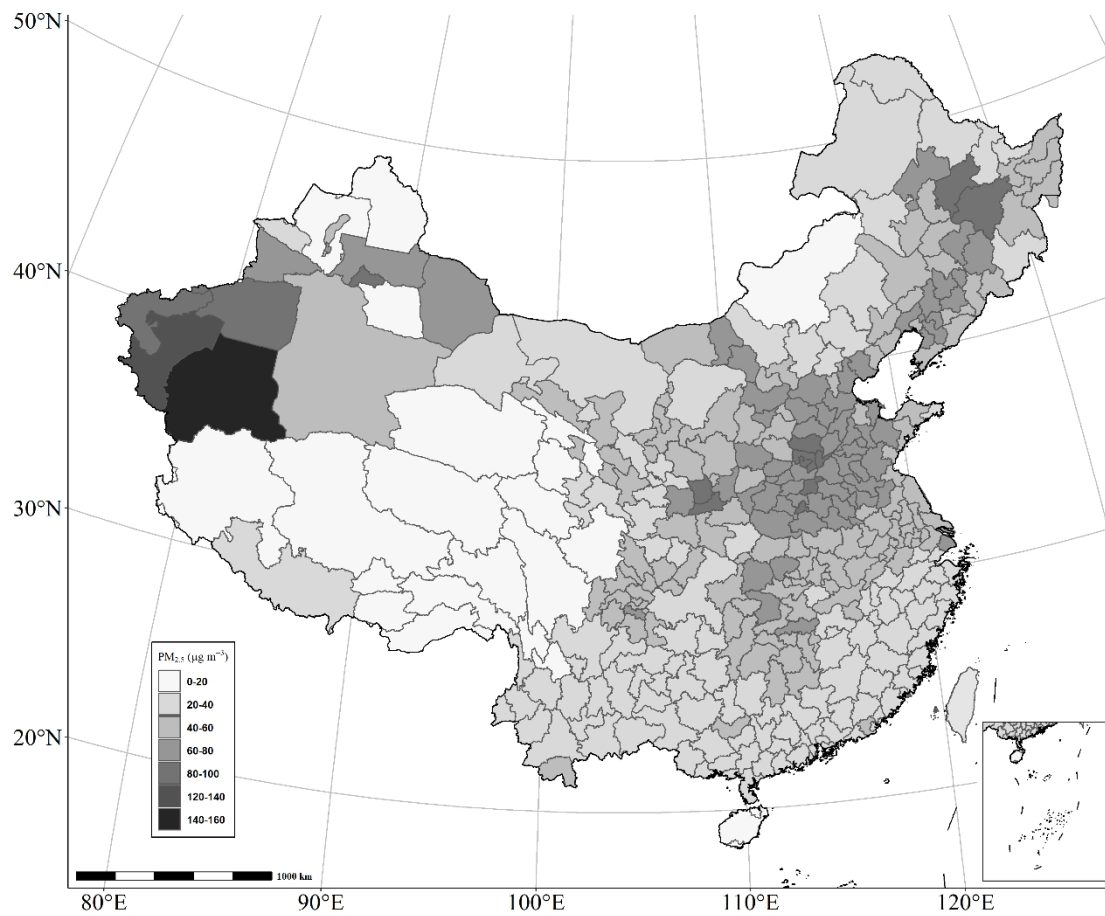

Figure S3. The distribution of the average concentration of PM<sub>2.5</sub> during the COVID-19 epidemic in China.

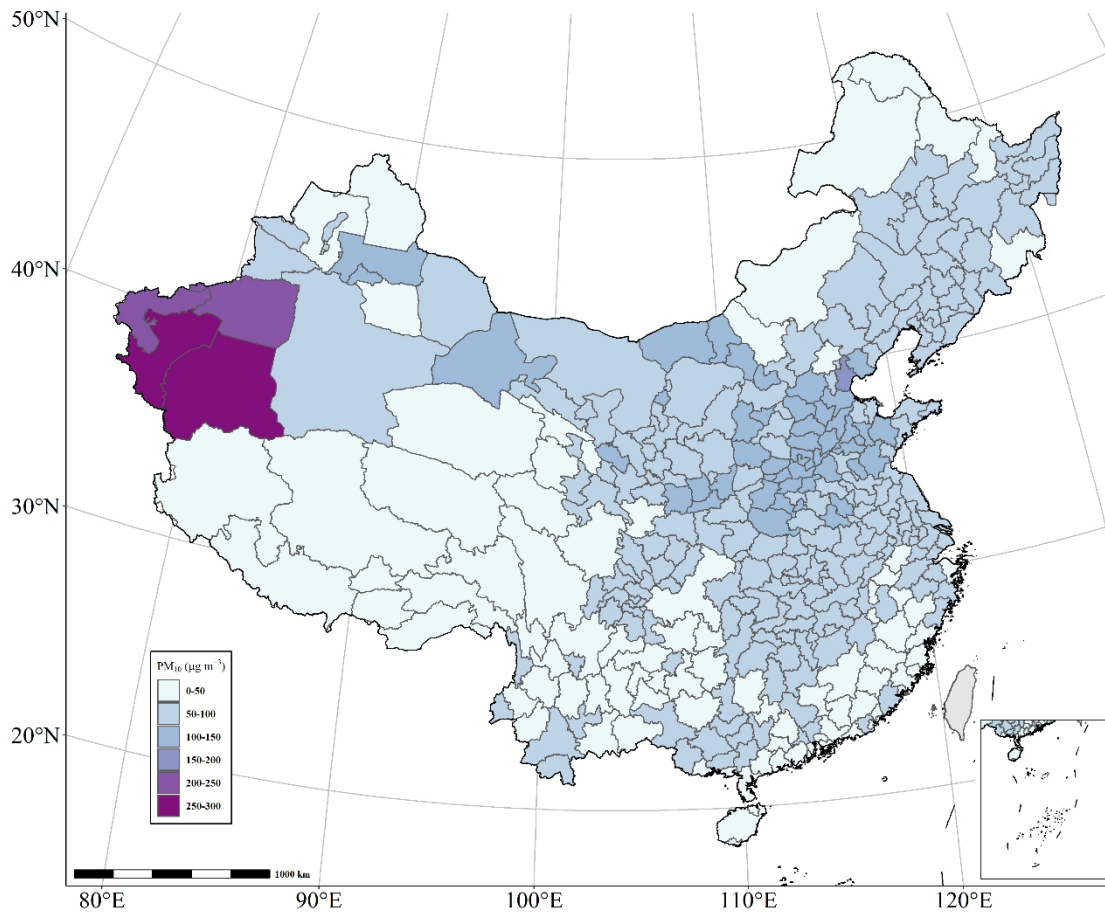

Figure S4. The distribution of the average concentration of PM<sub>10</sub> during the COVID-19 epidemic in China.

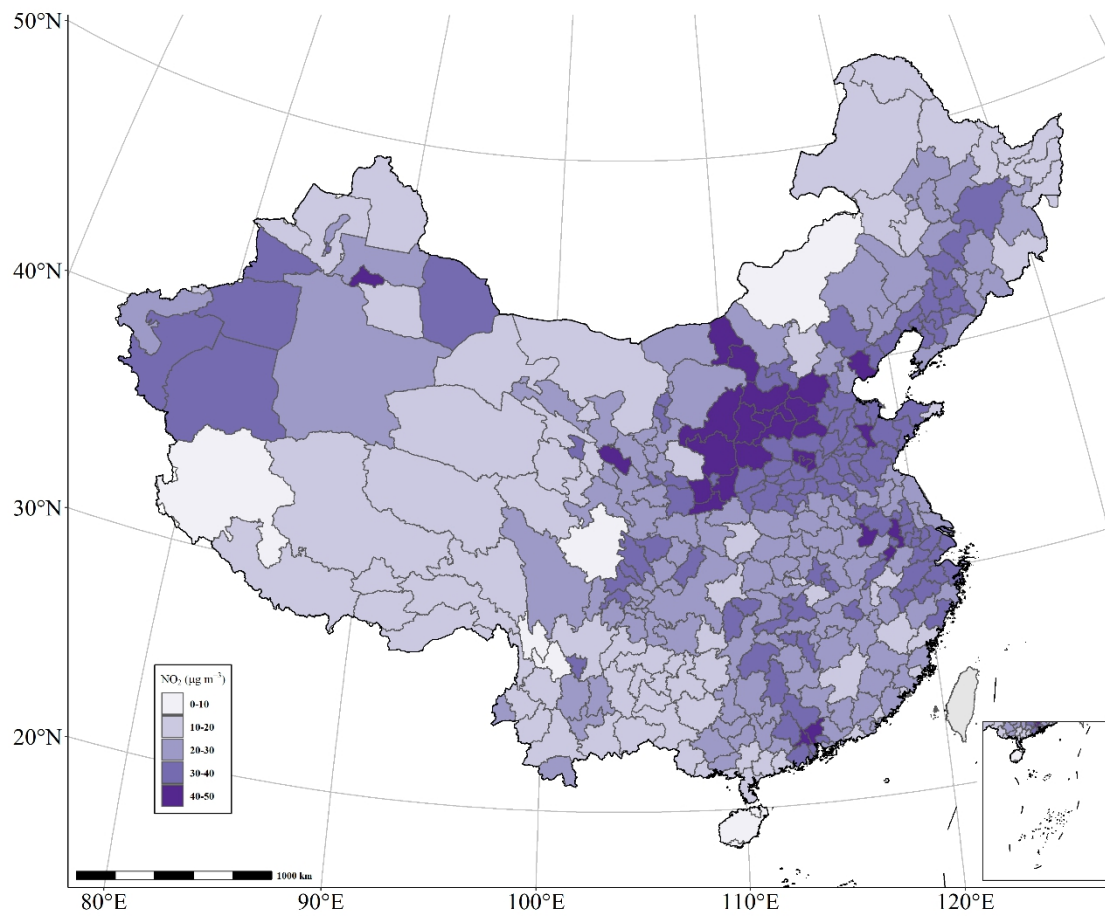

Figure S5. The distribution of the average concentration of NO<sub>2</sub> during the COVID-19 epidemic in China.



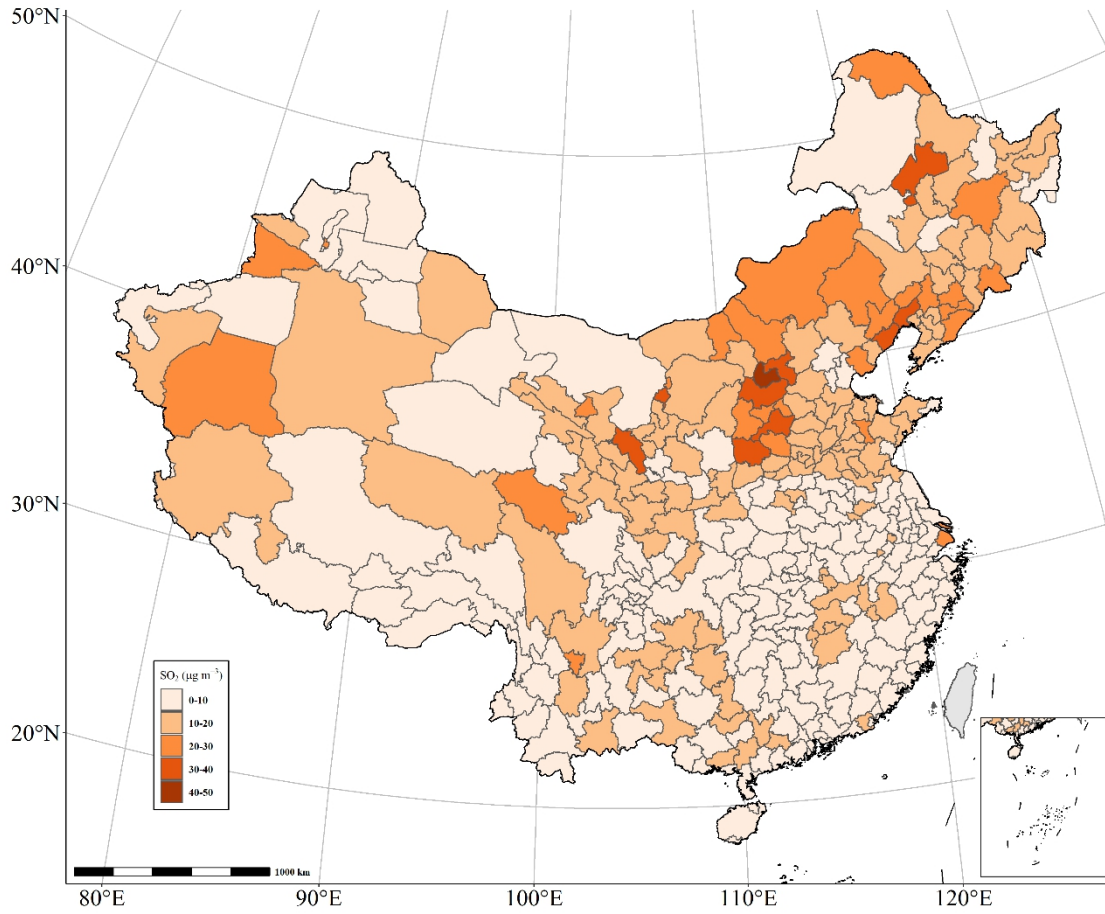

Figure S6. The distribution of the average concentration of SO<sub>2</sub> during the COVID-19 epidemic in China.

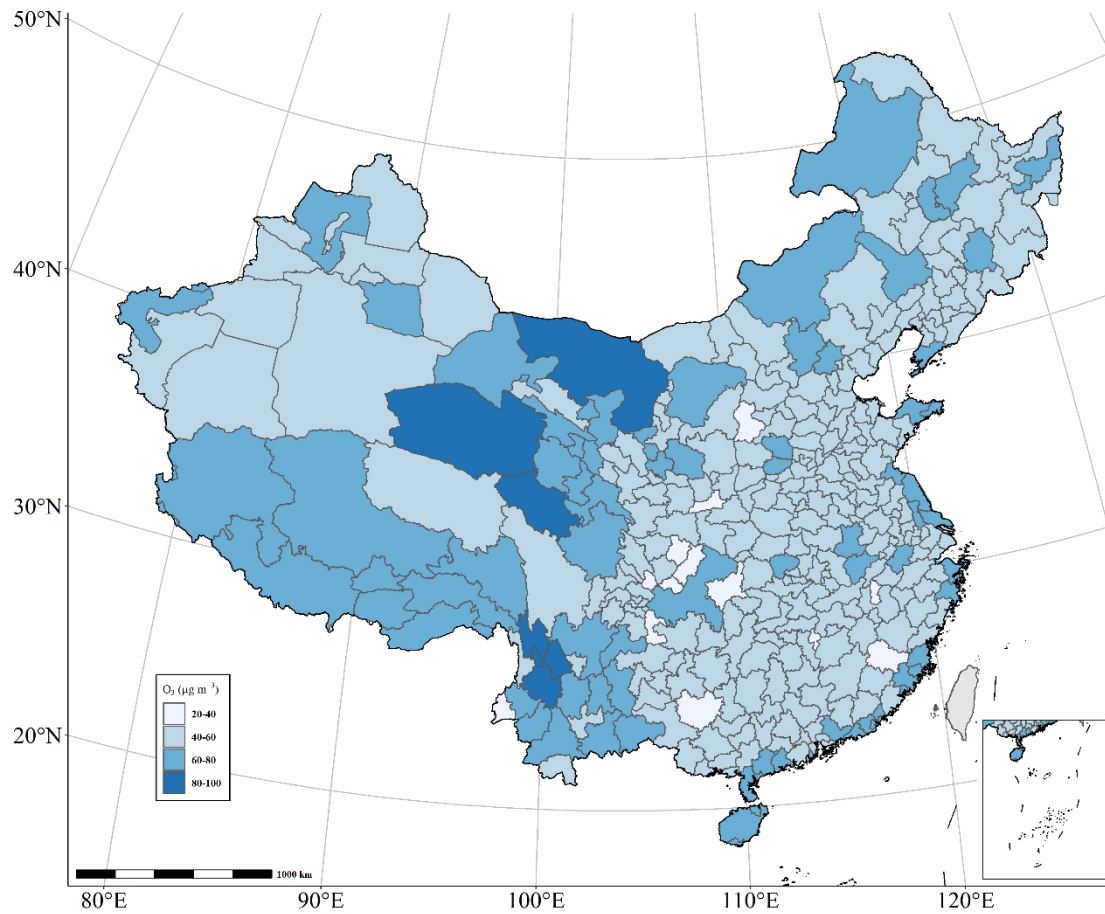

Figure S7. The distribution of the average concentration of O<sub>3</sub> during the COVID-19 epidemic in China.

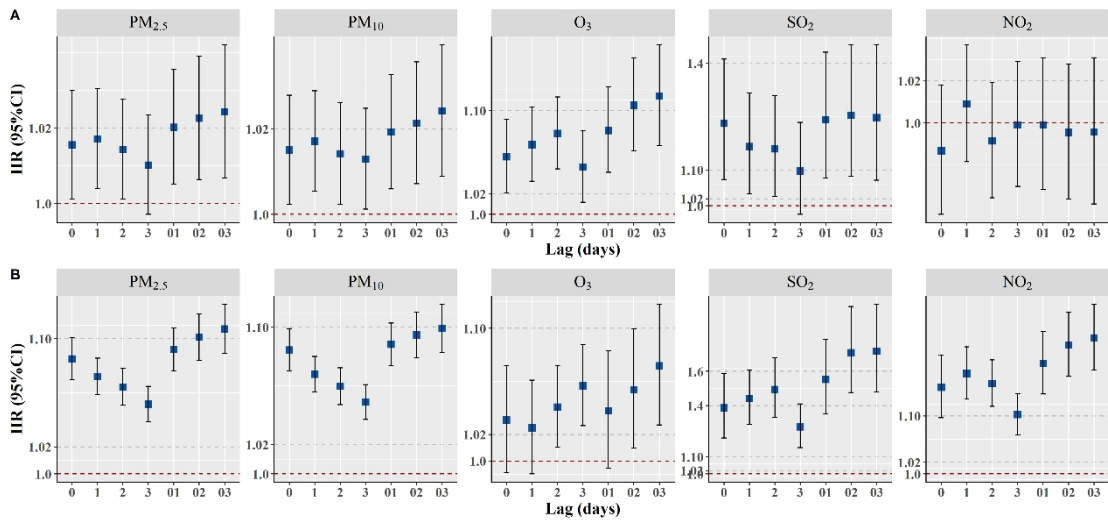

Figure S8. Hazard ratios (HRs) and 95% CIs of COVID-19 case-fatality associated with each 10 µg/m<sup>3</sup> increase in air pollutant concentrations at different lags in China.

Effect estimation using the date of symptom onset (A) and the date of diagnosis (B) are shown.

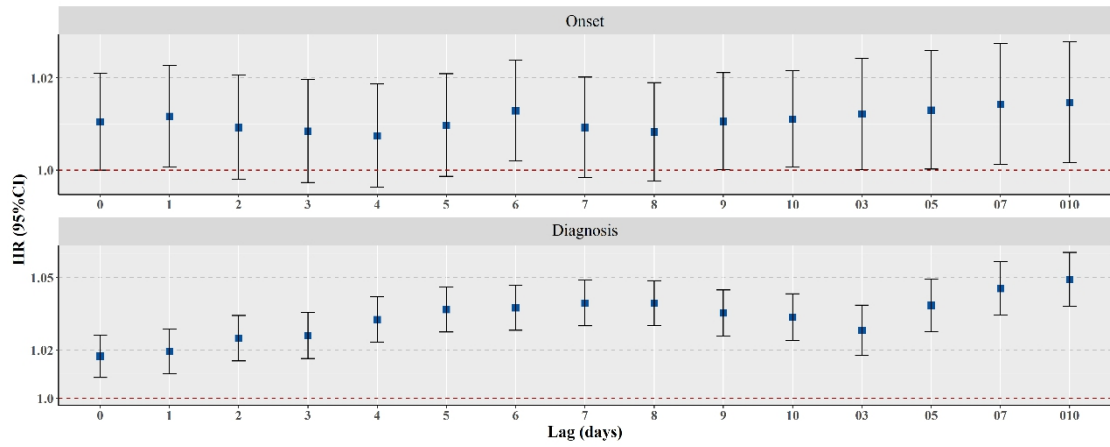

Figure S9. Hazard ratios (HRs) and 95% CIs of case-fatality of COVID-19 associated with each 1 °C decrease in temperature at different lag days in China. Effect estimations using the date of onset and diagnosis are shown.

Text S1. Regression equations for Cox regression model III for ambient air pollution.

$$h(t) = h_0 * \exp(\beta_1 X_1 + \beta_2 X_2 + \beta_3 X_3 + \beta_4 X_4 + \beta_5 X_5 + \beta_6 X_6 + \beta_7 X_7 + \beta_8 X_8 + \beta_9 X_9 + \beta_{10} X_{10} \\ + \beta_{11} X_{11} + \beta_{12} X_{12} + \beta_{13} X_{13} + \beta_{14} X_{14})$$

where:

$t$  represents the survival time;

$h(t)$  is the hazard function determined by a set of variates ( $X_1, X_2, \dots, X_{14}$ );

The term  $h_0$  is called the baseline hazard. It corresponds to the value of the hazard if all the  $X_i$  are equal to zero. The 't' in  $h(t)$  reminds us that the hazard may vary over time.

The coefficients ( $\beta_1, \beta_2, \dots, \beta_{14}$ ) = effects parameter estimates;

$X_1$  = gaseous pollutants (PM<sub>2.5</sub>, PM<sub>10</sub>, NO<sub>2</sub>, SO<sub>2</sub>, and O<sub>3</sub>);

$X_2$  = sex (female or male);

$X_3$  = age group (<25 years, 25-65 years, and ≥65 years);

$X_4$  = residence (local or migrant);

$X_5$  = occupation (medical-related, service-related, office worker, home worker, and others);

$X_6$  = severity of the illness (mild/asymptomatic, moderate, severe, critical);

$X_7$  = location (Wuhan or Non-Wuhan);

$X_8$  = transfer to a better hospital or not (yes or no);

$X_9$  = time trend;

$X_{10}$  = temperature;

$X_{11}$  = relative humidity;

$X_{12}$  = lockdown (before or after);

$X_{13}$  = city-level GDP;

$X_{14}$  = hospital beds per 1000 persons.

Text S2. Regression equations for Cox regression model III for ambient temperature.

$$h(t) = h_0 * \exp(\beta_1 X_t + \beta_2 X_2 + \beta_3 X_3 + \beta_4 X_4 + \beta_5 X_5 + \beta_6 X_6 + \beta_7 X_7 + \beta_8 X_8 + \beta_9 X_9 + \beta_{10} X_{10} + \beta_{11} X_{11} + \beta_{12} X_{12} + \beta_{13} X_{13})$$

where:

$t$  represents the survival time;

$h(t)$  is the hazard function determined by a set of variates ( $X_t, X_2, \dots, X_{13}$ );

The term  $h_0$  is called the baseline hazard. It corresponds to the value of the hazard if all the  $X_i$  are equal to zero. The 't' in  $h(t)$  reminds us that the hazard may vary over time.

The coefficients ( $\beta_1, \beta_2, \dots, \beta_{13}$ ) = effects parameter estimates;

$X_t$  = temperature;

$X_2$  = sex (female or male);

$X_3$  = age group (<25 years, 25-65 years, and  $\geq 65$  years);

$X_4$  = residence (local or migrant);

$X_5$  = occupation (medical-related, service-related, office worker, home worker, and others);

$X_6$  = severity of the illness (mild/asymptomatic, moderate, severe, critical);

$X_7$  = location (Wuhan or Non-Wuhan);

$X_8$  = transfer to a better hospital or not (yes or no);

$X_9$  = time trend;

$X_{10}$  = relative humidity;

$X_{11}$  = lockdown (before or after);

$X_{12}$  = city-level GDP;

$X_{13}$  = hospital beds per 1000 persons.
